# Supplementary material for: Biporous silica nanostructure-induced nanovortex in microfluidics for nucleic acid enrichment, isolation, and PCR-free detection
Source: PubMed Central journal article supplement (PMC10866868; doi:10.1038/s41467-024-45467-w), 2024-02-14
Supplement: 41467_2024_45467_MOESM3_ESM.pdf [file 41467_2024_45467_MOESM3_ESM.pdf]

## **DESCRIPTION FOR ADDITIONAL SUPPLEMENTARY FILES DOCUMENT**

**Supplementary Movie 1.** Flow simulation of the PSNF model.

**Supplementary Movie 2.** Flow simulation of the BSNF model.

**Supplementary Movie 3.** Flow simulation of the Flat model.

**Supplementary Movie 4.** Video of the particle proximity test.
